# Supplementary material for: A brush-like Cu2O–CoO core–shell nanoarray: an efficient bifunctional electrocatalyst for overall seawater splitting
Source: Royal Society of Chemistry journal article supplement (doi:10.1039/d3cc02359a), 2023-01-01
Supplement: d3cc02359a1.pdf [file d3cc02359a1.pdf]

## Electronic Supplementary Information

### Experimental Section

**Materials:** All chemical reagents were purchased from commercial suppliers and were used as received without further purification. Cu foam (CF) was provided by Tianjin Kemiou Chemical Reagent Co., Ltd. Water used throughout all experiments was purified by a Millipore ultrapure water system. Seawater used in this work was collected from Weihai, Shandong, China. The collected seawater was first filtered by a 0.22  $\mu\text{m}$  filter membrane to get rid of the pollutants. After adding KOH, the sample was centrifuged to remove the precipitate and used as the electrolyte. The major ions in seawater are:  $\text{Cl}^-$  (18980 ppm),  $\text{Na}^+$  (10556 ppm),  $\text{SO}_4^{2-}$  (2649 ppm),  $\text{Mg}^{2+}$  (1262 ppm),  $\text{Ca}^{2+}$  (400 ppm),  $\text{K}^+$  (380 ppm),  $\text{HCO}_3^-$  (140 ppm),  $\text{Sr}^{2+}$  (13 ppm),  $\text{Br}^-$  (65 ppm),  $\text{BO}_3^{3-}$  (26 ppm),  $\text{F}^-$  (1 ppm),  $\text{SiO}_3^{2-}$  (1 ppm), and  $\text{I}^-$  (<1 ppm).

**Preparation of  $\text{Cu}_2\text{O-CoO/CF}$ :** In brief, CF was washed with diluted HCl and water for several times to remove the surface impurities. Then a piece of clean CF was rapidly immersed into a 30 mL mixed solution (0.685 g ammonium persulfate and 3.0 g NaOH) at room temperature for 20 minutes to get  $\text{Cu}(\text{OH})_2$  nanowire arrays on CF ( $\text{Cu}(\text{OH})_2/\text{CF}$ ) (Fig. S1). The  $\text{Cu}(\text{OH})_2/\text{CF}$  was transferred to a 50 mL glass beaker containing 0.075 M  $\text{CoSO}_4 \cdot 7\text{H}_2\text{O}$  and 1.125 M urea. Subsequently, it was reacted at 85  $^\circ\text{C}$  for 4 hours. Finally, the resulting precursor (Fig. S2) was annealed at 350  $^\circ\text{C}$  in Ar for 2 h to obtain  $\text{Cu}_2\text{O-CoO/CF}$ .

**Preparation of  $\text{CoO/CF}$  and  $\text{Cu}_2\text{O/CF}$ :**  $\text{Co}(\text{NO}_3)_2 \cdot 6\text{H}_2\text{O}$  (1.245 g),  $\text{NH}_4\text{F}$  (0.315 g) and urea (1.283 g) were dissolved in 40 mL water under vigorous stirring for 20 min. Then the solution was transferred into a Teflon-lined stainless autoclave and a piece of CF was immersed into the autoclave contained solution. The autoclave was sealed and maintained at 120  $^\circ\text{C}$  for 6 h in an electric oven. The resulting CF was annealed at 350  $^\circ\text{C}$  for 2 h under Ar atmosphere to obtain  $\text{CoO/CF}$ . To prepare  $\text{Cu}_2\text{O/CF}$ , the  $\text{Cu}(\text{OH})_2/\text{CF}$  was heated at 350  $^\circ\text{C}$  for 2 h in a flow Ar atmosphere.

**Characterizations:** XRD data were acquired by a LabX XRD-6100 X-ray diffractometer with a Cu  $\text{K}\alpha$  radiation (40 kV, 30 mA) of wavelength 0.154 nm

(SHIMADZU, Japan). SEM measurements were carried out on a GeminiSEM 300 scanning electron microscope (ZEISS, Germany) at an accelerating voltage of 5 kV. TEM image was obtained from a Zeiss Libra 200FE transmission electron microscope operated at 200 kV. XPS measurements were performed using an ESCALABMK II X-ray photoelectron spectrometer with the exciting source of Mg. Cu and Co content in electrolyte was measured by inductively coupled plasma mass spectrometry (ICP-MS; Bruker Aurora M90 ICP-MS). Raman spectra were measured using a RENISHAW in Via Reflex spectrometer. UV-Vis spectra were obtained using a Hitachi U-3900H spectrophotometer.

**Electrochemical measurements:** The OER and HER measurements were performed with a CHI 660E electrochemical workstation (CH Instruments, Inc., Shanghai) in a conventional three electrode system. The electrolyte was 1.0 M KOH or 1.0 M KOH + seawater, using carbon rod as the counter electrode and Hg/HgO as the reference electrode. The overall water/seawater-splitting performance of the electrolyzers were tested in a two-electrode system, where OER electrodes are as the anode and HER electrodes as the cathode. All potentials reported in this work were converted to reversible hydrogen electrode (RHE) scale: ( $E_{\text{RHE}} = E_{\text{Hg/HgO}} + 0.059 \times \text{pH} + 0.098 \text{ V}$ ). The catalytic activity of catalysts was determined by linear sweep voltammetry (LSV) curves with a scan rate of 5 mV/s. All polarization curves have been reported with  $iR$  compensation. The  $iR$ -compensated potential was obtained after the correction of solution resistance measured following the equation:  $E_{\text{corr}} = E - iR$ , where  $E$  is the original potential,  $R$  is the solution resistance,  $i$  is the corresponding current, and  $E_{\text{corr}}$  is the  $iR$ -compensated potential. The  $C_{\text{dl}}$  values for electrodes were calculated according to the CV curves at different scan rates (20-100 mV/s) in the double-layer region without Faradaic processes.

**Determination of ClO<sup>-</sup>:** The yield of ClO<sup>-</sup> in the electrolyte was measured based on the N,N-diethyl-1,4-phenylenediamine sulfate (DPD) colorimetric method using a UV-Vis spectrophotometer. Firstly, the 100  $\mu\text{L}$  of electrolyte was successively mixed with 50  $\mu\text{L}$  of H<sub>2</sub>SO<sub>4</sub> (1.0 M), 50  $\mu\text{L}$  of NaOH (2.0 M), and 4.8 mL of deionized water. Then, 250  $\mu\text{L}$  of DPD reagent and 250  $\mu\text{L}$  of PBS were added to the above

solution. After standing for two minutes, the color of the solution changed to transparent pink. The concentration of  $\text{ClO}^-$  was calculated by UV-vis spectroscopy for a certain wavelength of about 515 nm.

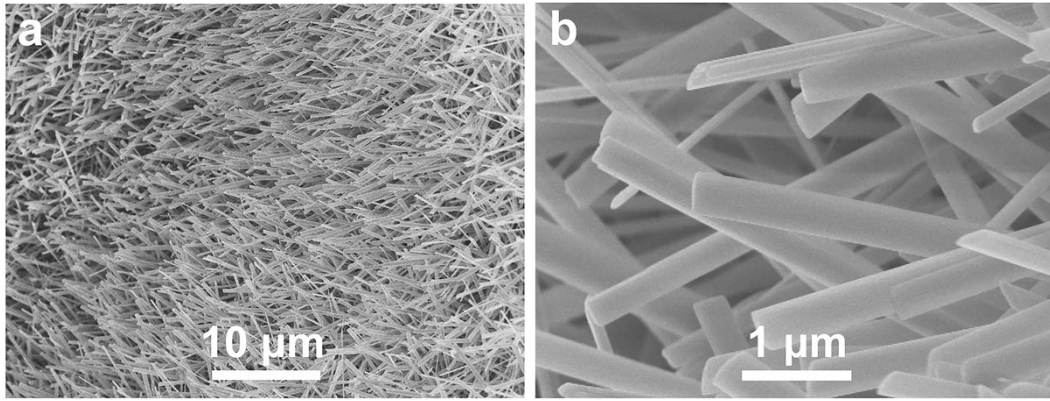

**Fig. S1.** SEM images of  $\text{Cu}(\text{OH})_2$  nanowire arrays.

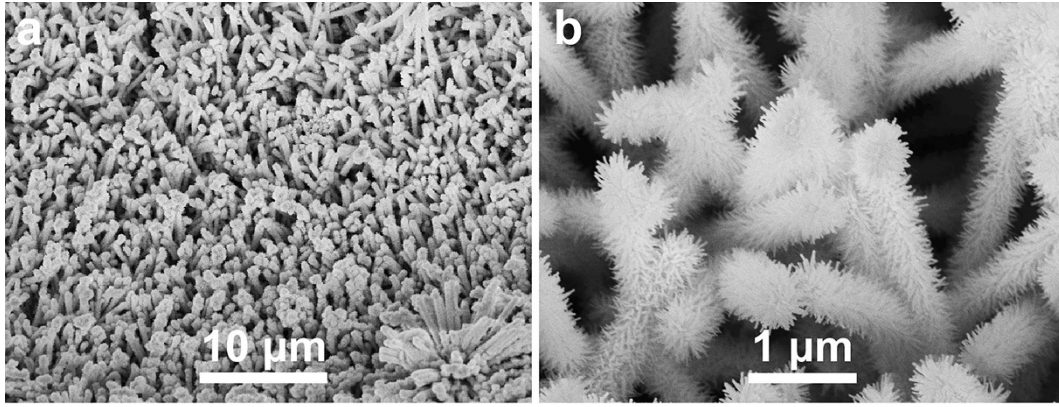

**Fig. S2.** SEM images of Cu<sub>2</sub>O-CoO/CF precursor.

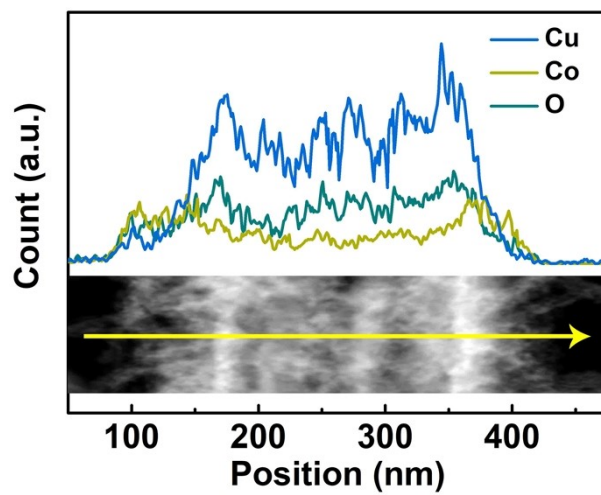

**Fig. S3.** EDS line-scan profiles of  $\text{Cu}_2\text{O-CoO}$  nanowire.

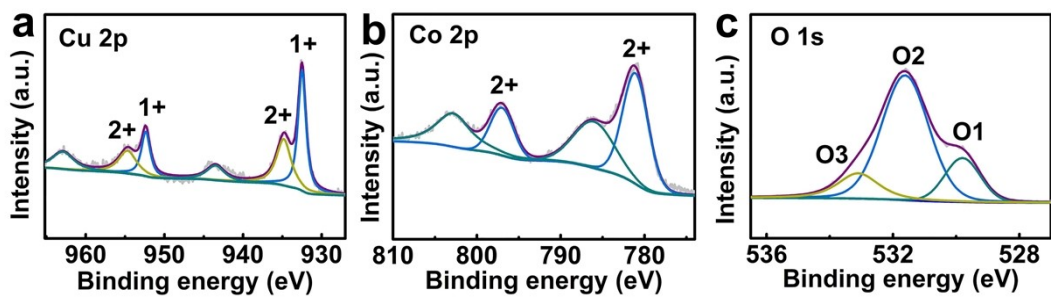

Fig. S4. XPS spectra of Cu 2p, Co 2p, and O 1s for Cu<sub>2</sub>O-CoO/CF.

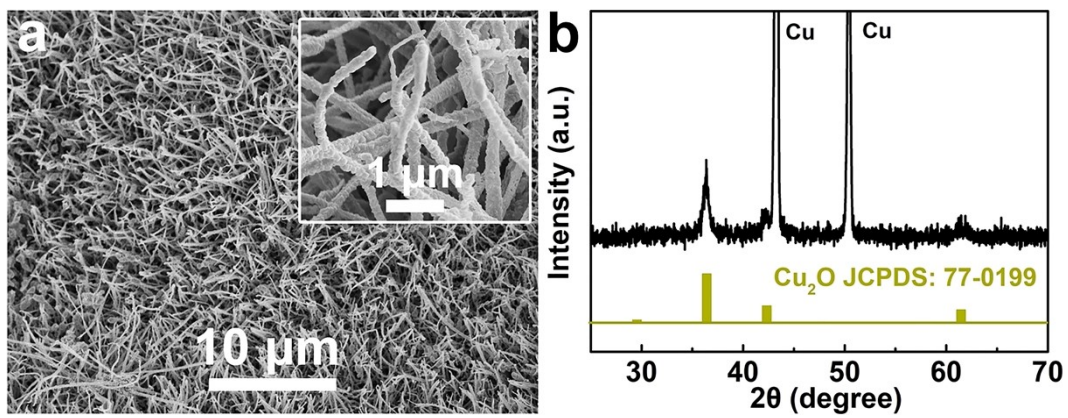

**Fig. S5.** SEM images and XRD pattern of Cu<sub>2</sub>O/CF.



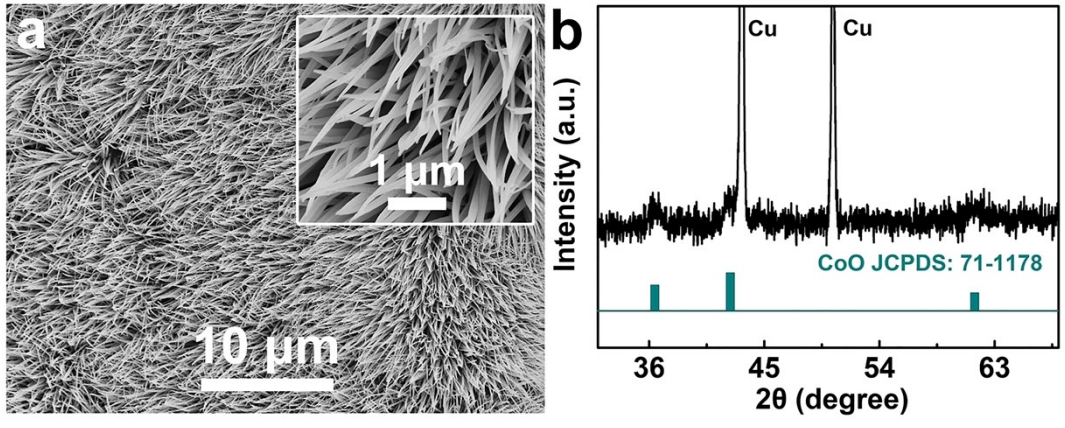

**Fig. S6.** SEM images and XRD pattern of CoO/CF.

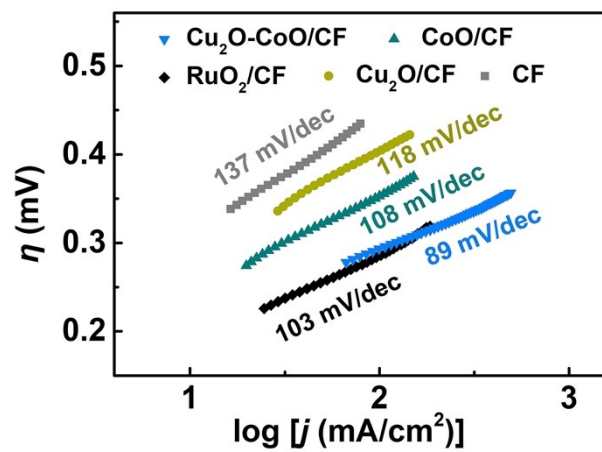

**Fig. S7.** Tafel plots of  $\text{Cu}_2\text{O-CoO}/\text{CF}$ ,  $\text{Cu}_2\text{O}/\text{CF}$ ,  $\text{CoO}/\text{CF}$ ,  $\text{RuO}_2/\text{CF}$ , and  $\text{CF}$ .

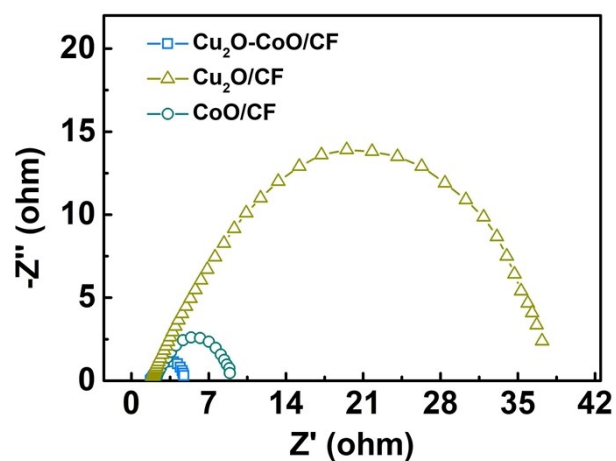

**Fig. S8.** Nyquist plots of Cu<sub>2</sub>O-CoO/CF, Cu<sub>2</sub>O/CF, and CoO/CF. The electrical resistances of Cu<sub>2</sub>O-CoO/CF, CoO/CF, and Cu<sub>2</sub>O/CF are 2.65 Ω, 5.66 Ω, and 25.67 Ω, respectively.

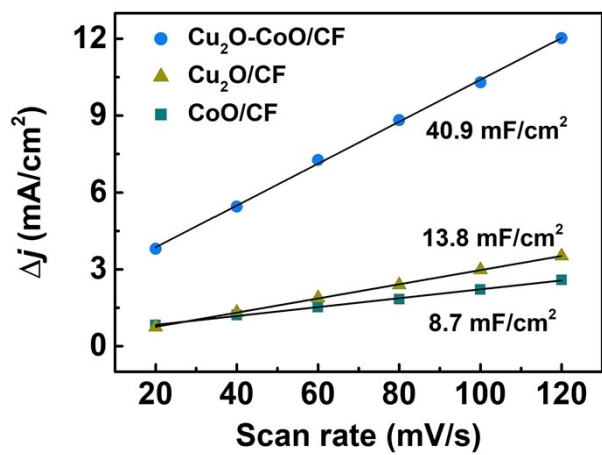

**Fig. S9.** Calculated electrochemical  $C_{dl}$  for  $\text{Cu}_2\text{O-CoO/CF}$ ,  $\text{Cu}_2\text{O/CF}$ , and  $\text{CoO/CF}$ .

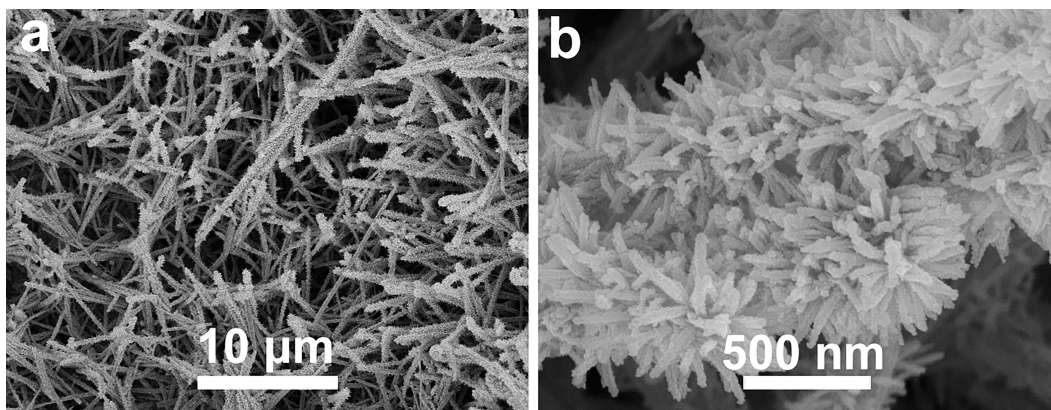

**Fig. S10.** SEM images of post-OER  $\text{Cu}_2\text{O-CoO/CF}$  tested in alkaline seawater.

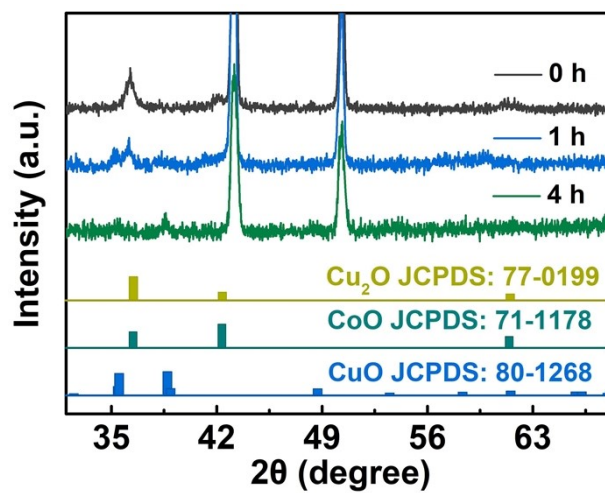

**Fig. S11.** XRD pattern of Cu<sub>2</sub>O-CoO/CF at different OER electrolysis times in alkaline seawater.

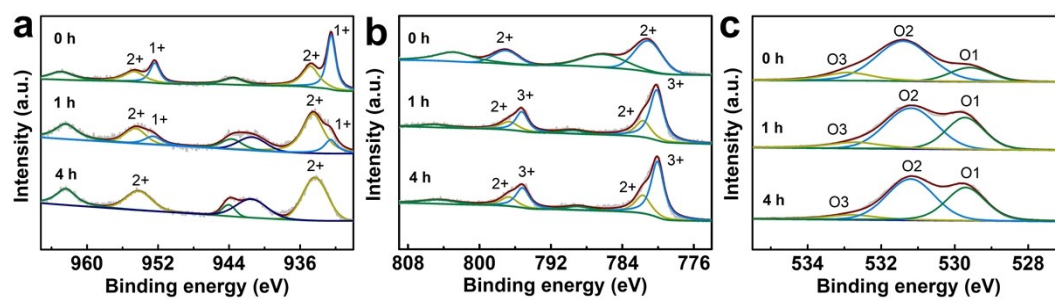

**Fig. S12.** XPS spectra of (a) Cu 2p, (b) Co 2p, and (c) O 1s for Cu<sub>2</sub>O-CoO/CF at different OER electrolysis times in alkaline seawater.

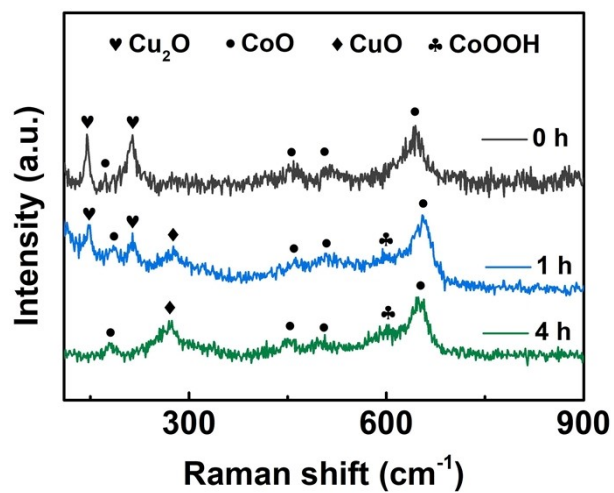

**Fig. S13.** Raman spectra of  $\text{Cu}_2\text{O-CoO/CF}$  at different OER electrolysis times in alkaline seawater.



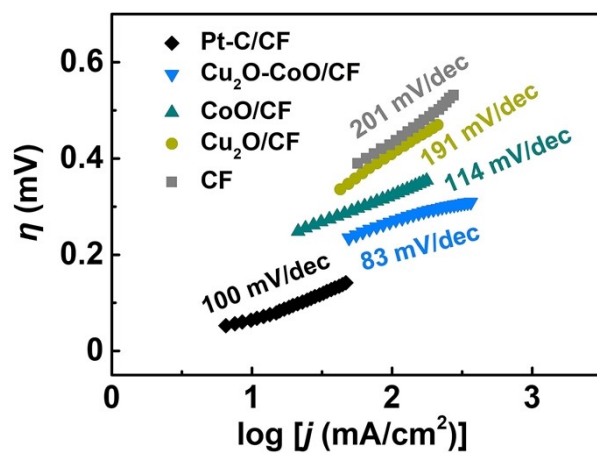

Fig. S14. Tafel plots of Cu<sub>2</sub>O-CoO/CF, Cu<sub>2</sub>O/CF, CoO/CF, Pt-C/CF, and CF.

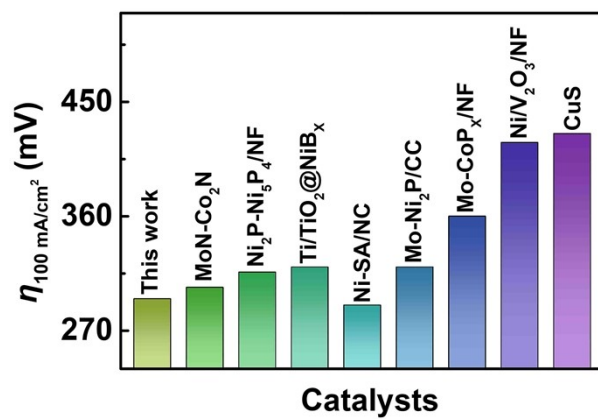

**Fig. S15.** Comparison of the  $\eta$  required at 100 mA/cm<sup>2</sup> for Cu<sub>2</sub>O-CoO/CF with those of other seawater electrocatalysts.

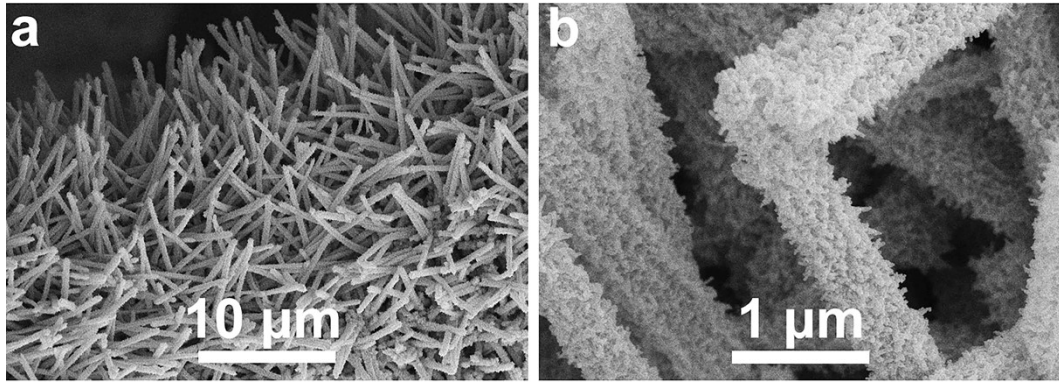

**Fig. S16.** SEM images of post-HER  $\text{Cu}_2\text{O-CoO/CF}$  tested in alkaline seawater.

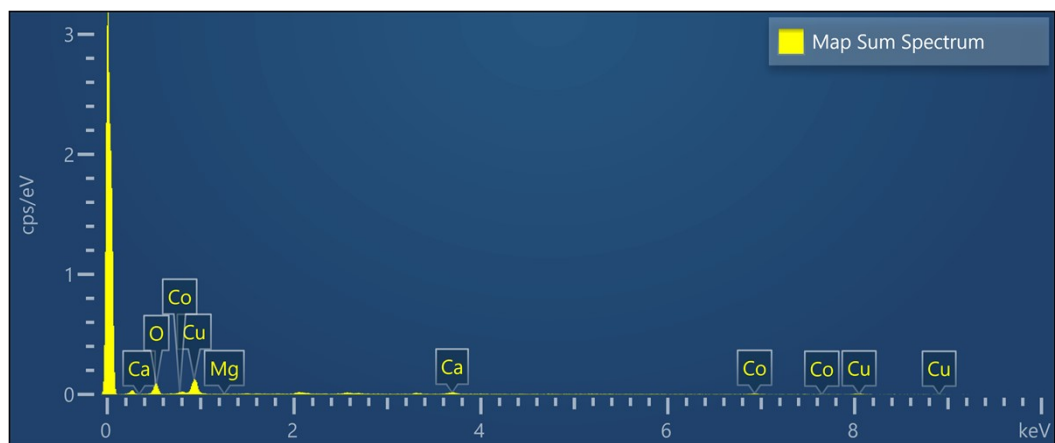

**Fig. S17.** EDS spectrum of post-HER  $\text{Cu}_2\text{O-CoO/CF}$  tested in alkaline seawater.

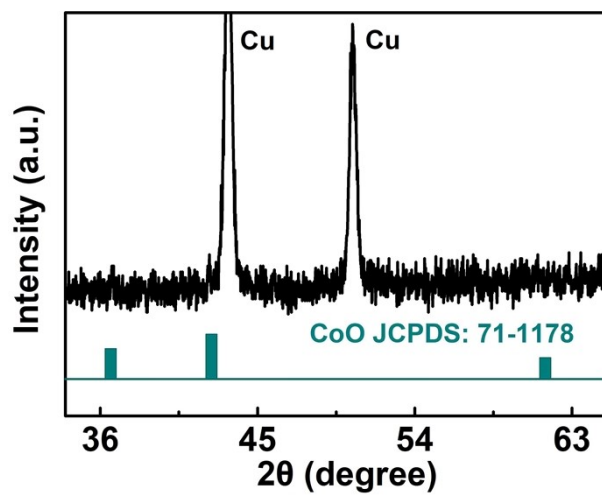

**Fig. S18.** XRD pattern of post-HER  $\text{Cu}_2\text{O-CoO/CF}$  tested in alkaline seawater.

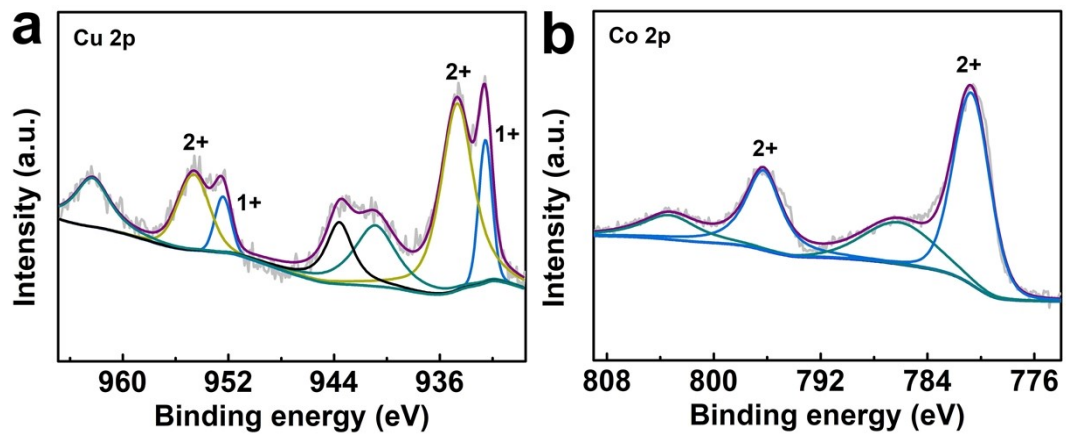

**Fig. S19.** XPS spectra of Cu 2p and Co 2p for Cu<sub>2</sub>O-CoO/CF after stability test in alkaline seawater.

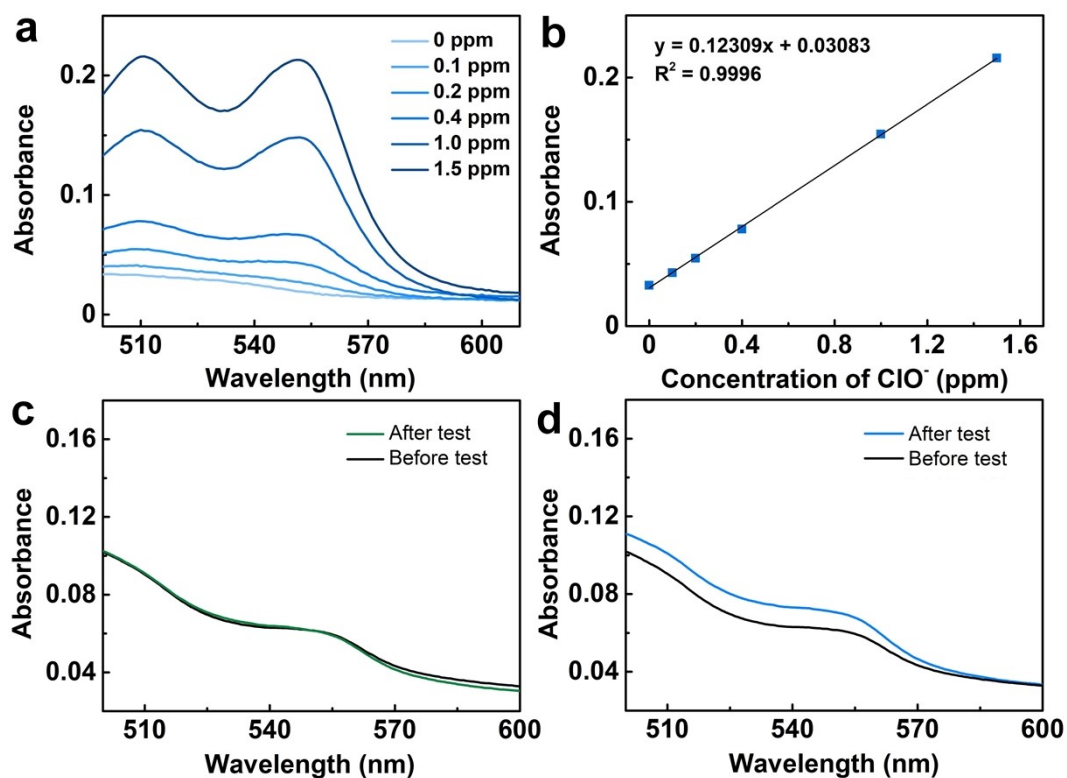

**Fig. S20.** (a) UV-Vis absorption spectra and (b) corresponding calibration curve used for calculation of  $\text{ClO}^-$  concentration. UV-Vis spectra of (c) catholyte and (d) anolyte for  $\text{Cu}_2\text{O-CoO/CF}$  before and after FE test in alkaline seawater. The volume of both cathode and anode electrolytes was 40 mL. As shown in Fig. S18c and S18d, no  $\text{ClO}^-$  was generated at the cathode, and only a small amount of  $\text{ClO}^-$  (0.032 mmol) was produced at the anode.

**Table S1** Comparison of OER performances of Cu<sub>2</sub>O-CoO/CF with other reported electrocatalysts in alkaline seawater.

| Catalyst                                             | Electrolyte                   | $\eta$ (mV) @ $j$<br>(100 mA/cm <sup>2</sup> ) | Refs.                                                               |
|------------------------------------------------------|-------------------------------|------------------------------------------------|---------------------------------------------------------------------|
| <b>Cu<sub>2</sub>O-CoO/CF</b>                        | <b>1 M KOH +<br/>Seawater</b> | <b>315</b>                                     | <b>This work</b>                                                    |
| Ni <sub>2</sub> P-Ni <sub>3</sub> P <sub>4</sub> /NF | 1 M KOH +<br>Seawater         | 345                                            | <i>Adv. Funct. Mater.</i> ,<br>2021, <b>31</b> , 2006484            |
| NMN/NF                                               | 1 M KOH +<br>Seawater         | 380                                            | <i>Electrochim. Acta</i> , 2021,<br><b>390</b> , 138833             |
| RuNi-Fe <sub>2</sub> O <sub>3</sub> /IF              | 1 M KOH +<br>Seawater         | 320                                            | <i>Chinese J. Catal.</i> , 2022,<br><b>43</b> , 2202                |
| NiCoS/NF                                             | 1 M KOH +<br>Seawater         | 360                                            | <i>Appl. Catal. B</i> , 2021,<br><b>291</b> , 120071                |
| Ti/TiO <sub>2</sub> @NiB <sub>x</sub> (PEE)          | 1 M KOH +<br>Seawater         | 530                                            | <i>Chem. Eng. J.</i> , 2022,<br><b>430</b> , 132881                 |
| NiMoN@NiFeN                                          | 1 M KOH +<br>Seawater         | 307                                            | <i>Nat. Commun.</i> , 2019, <b>10</b> ,<br>5106                     |
| S-(Ni,Fe)OOH                                         | 1 M KOH +<br>Seawater         | 300                                            | <i>Energy Environ. Sci.</i> ,<br>2020, <b>13</b> , 3439             |
| NiFe/NiS <sub>x</sub>                                | 1 M KOH +<br>Seawater         | 335                                            | <i>Proc. Natl. Acad. Sci.<br/>USA</i> , 2019, <b>116</b> , 6624     |
| Mo-CoP <sub>x</sub> /NF                              | 1 M KOH +<br>Seawater         | 530                                            | <i>Mater. Today Nano</i> ,<br>2022, <b>18</b> , 100216              |
| NiCo-DEA                                             | 1 M KOH +<br>Seawater         | 670                                            | <i>Electrochim. Acta</i> , 2017,<br><b>247</b> , 381                |
| S-NiMoO <sub>4</sub> @NiFe-<br>LDH/NF                | 1 M KOH +<br>Seawater         | 315                                            | <i>J. Colloid Interface Sci.</i> ,<br>2022, <b>613</b> , 349        |
| MoN-Co <sub>2</sub> N                                | 1 M KOH +<br>Seawater         | 357                                            | <i>ACS Appl. Mater.<br/>Interfaces</i> , 2022, <b>14</b> ,<br>41924 |
| Ni(TCNQ)/GP                                          | 1 M KOH +<br>Seawater         | 352                                            | <i>Nano Res.</i> , 2022, <b>15</b> ,<br>6084                        |
| NiPS/NF                                              | 1 M KOH +<br>Seawater         | 344                                            | <i>J. Energy Chem.</i> , 2022,<br><b>75</b> , 66                    |



**Table S2** Comparison of HER performances of Cu<sub>2</sub>O-CoO/CF with other reported electrocatalysts in alkaline seawater.

| Catalyst                                             | Electrolyte           | $\eta$ (mV) @ $j$<br>(100 mA/cm <sup>2</sup> ) | Refs.                                                        |
|------------------------------------------------------|-----------------------|------------------------------------------------|--------------------------------------------------------------|
| Cu <sub>2</sub> O-CoO/CF                             | 1 M KOH +<br>Seawater | 295                                            | This work                                                    |
| MoN-Co <sub>2</sub> N                                | 1 M KOH +<br>Seawater | 304                                            | <i>ACS Appl. Mater. Interfaces</i> , 2022, <b>14</b> , 41924 |
| Mo-CoP <sub>x</sub> /NF                              | 1 M KOH +<br>Seawater | 360                                            | <i>Mater. Today Nano</i> , 2022, <b>18</b> , 100216          |
| Ni <sub>2</sub> P-Ni <sub>3</sub> P <sub>4</sub> /NF | 1 M KOH +<br>Seawater | 316                                            | <i>Adv. Funct. Mater.</i> , 2021, <b>31</b> , 2006484.       |
| Ti/TiO <sub>2</sub> @NiB <sub>x</sub> (PEE)          | 1 M KOH +<br>Seawater | 320                                            | <i>Chem. Eng. J.</i> , 2022, <b>430</b> , 132881             |
| Ni-SA/NC                                             | 1 M KOH +<br>Seawater | 290                                            | <i>Adv. Mater.</i> , 2021, <b>33</b> , 2003846               |
| Mo-Ni <sub>2</sub> P/CC                              | 1 M KOH +<br>Seawater | 320                                            | <i>New J. Chem.</i> , 2022, <b>46</b> , 20602                |
| Ni/V <sub>2</sub> O <sub>3</sub> /NF                 | 1 M KOH +<br>Seawater | 418                                            | <i>Chem. Eng. J.</i> , 2022, <b>450</b> , 138079             |
| CuS                                                  | 1 M KOH +<br>Seawater | 425                                            | <i>Int. J. Energy Res.</i> , 2022, <b>46</b> , 19723         |
| 1D-Cu@Co-CoO/Rh                                      | 1 M KOH +<br>Seawater | 320                                            | <i>Small</i> , 2021, <b>17</b> , 2103826                     |
| NiFe LDH/FeOOH                                       | 1 M KOH +<br>Seawater | 350                                            | <i>Inorg. Chem.</i> , 2021, <b>60</b> , 17371                |

**Table S3** Comparison of overall seawater splitting performances of Cu<sub>2</sub>O-CoO/CF with other reported bifunctional electrocatalysts in seawater.

| Catalyst                                     | Electrolyte               | Voltage (V) @ <i>j</i><br>(100 mA/cm <sup>2</sup> ) | Refs.                                                       |
|----------------------------------------------|---------------------------|-----------------------------------------------------|-------------------------------------------------------------|
| <b>Cu<sub>2</sub>O-CoO/CF</b>                | <b>1 M KOH + Seawater</b> | <b>1.82</b>                                         | <b>This work</b>                                            |
| Mn-doped Ni <sub>2</sub> P/Fe <sub>2</sub> P | 1 M KOH + 0.5 M NaCl      | 1.83                                                | <i>Chem. Eng. J.</i> , 2022, DOI: 10.1016/j.cej.2022.140061 |
| 3%Er-MoO <sub>2</sub>                        | 1 M KOH + 0.5 M NaCl      | 2.0                                                 | <i>Appl. Surf. Sci.</i> , 2023, <b>615</b> , 156360         |
| CoMnRu@CNT                                   | 1 M KOH + Seawater        | 2.15                                                | <i>J. Colloid Inter. Sci.</i> , 2023, <b>646</b> , 844      |
| Ru-CoO <sub>x</sub> /NF                      | Seawater                  | 1.86                                                | <i>Small</i> , 2021, <b>17</b> , 2102777                    |
| GO@Fe@NiCo                                   | 1 M KOH + Seawater        | 1.82                                                | <i>J. Mater. Chem. A</i> , 2020, <b>8</b> , 24501-24514     |
| NMN/NF                                       | 1 M KOH + Seawater        | 1.82                                                | <i>Electrochim. Acta</i> , 2021, <b>390</b> , 138833        |
| 1D-Cu@Co-CoO/Rh                              | 1 M KOH + Seawater        | 1.9                                                 | <i>Small</i> , 2021, <b>17</b> , 2103826                    |
| Mo-CoP <sub>x</sub> /NF                      | 1 M KOH + Seawater        | 2.16                                                | <i>Mater. Today Nano</i> , 2022, <b>18</b> , 100216         |

**Table S4** Element analysis of electrolytes after the long-term overall water and seawater splitting tests.

| <b>Electrolyte</b> | <b>Element</b> | <b>Element concentration (ppm)</b> | <b>Weight loss wt%</b> |
|--------------------|----------------|------------------------------------|------------------------|
| 1 M KOH            | Co             | 1.50                               | 2.96                   |
|                    | Cu             | 0.16                               |                        |
| 1 M KOH + Seawater | Co             | 2.71                               | 4.84                   |
|                    | Cu             | 0.27                               |                        |
